# Supplementary material for: Halogen-free ultra-high flame retardant polymers through enzyme catalysis
Source: Royal Society of Chemistry journal article supplement (doi:10.1039/c2gc16192c), 2012-01-01
Supplement: c2gc16192c.pdf [file c2gc16192c.pdf]

# Novel Halogen-Free Ultra High Flame Retardant Polymers Through Enzyme Catalysis

Sethumadhavan Ravichandran<sup>a,g</sup>, Subhalakshmi Nagarajan<sup>b,g</sup>, Bon Choel Ku<sup>c</sup>, Bryan Coughlin<sup>d</sup>, Todd Emrick<sup>d</sup>, Jayant Kumar<sup>e,g</sup>, and Ramaswamy Nagarajan<sup>f,g\*</sup>

<sup>a</sup> Department of Chemistry, University of Massachusetts, Lowell, MA 01854, USA

<sup>b</sup> U.S Army Natick Soldier Research, Development, and Engineering Center, Natick, MA 01796, USA

<sup>c</sup> Department of Polymer Science and Engineering, University of Massachusetts, Amherst, MA 01003, USA

<sup>d</sup> Department of Polymer Science and Engineering, University of Massachusetts, Amherst, MA 01003, USA

<sup>e</sup> Department of Physics, University of Massachusetts, Lowell, MA 01854, USA

<sup>f</sup> Department of Plastics Engineering, University of Massachusetts, Lowell, MA 01854, USA.

\*Email: Ramaswamy\_Nagarajan@uml.edu; Fax: +1 978-458-9571, Tel: +1 978-934-3454

<sup>g</sup> Center for Advanced Materials, University of Massachusetts, Lowell, MA 01854

† Electronic Supplementary Information (ESI) available:

Characterization of enzymatic synthesis was done using <sup>1</sup>H NMR spectra, collected using a Bruker 500 MHz NMR spectrometer. The solvent used was deuterated dimethylsulfoxide (DMSO - Cambridge Isotope Labs Inc.)

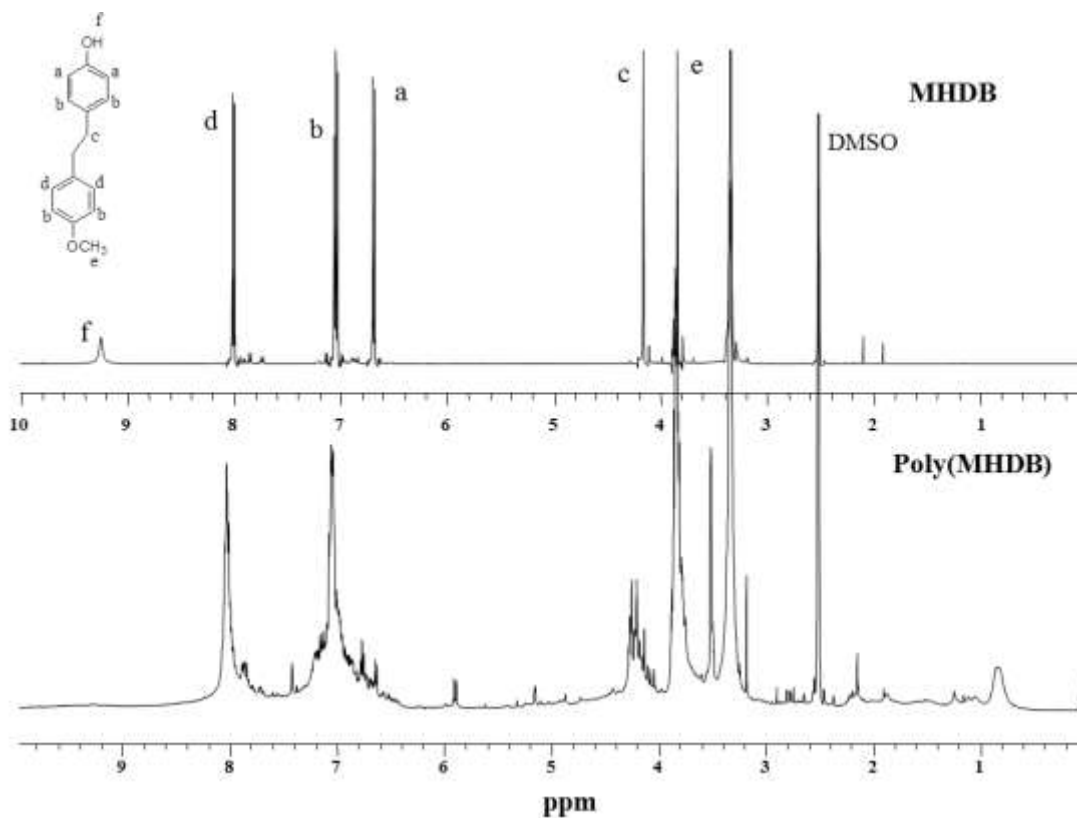

Figure. S1. <sup>1</sup>H NMR spectra of MHDB monomer and poly(MHDB)

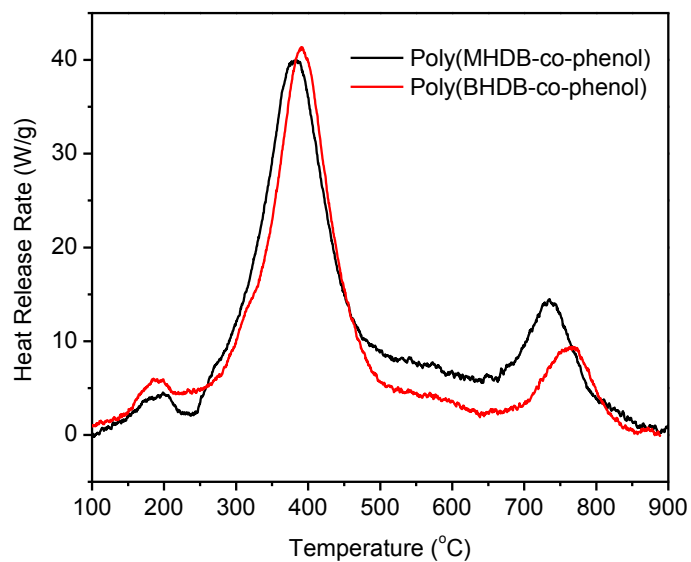

**Figure. S2. Heat release rate curves for poly(BHDB/MHDB-co-phenol)**
